# Supplementary material
Source: PubMed Central journal article supplement (PMC2734463)
Supplement: NIHMS138309-supplement-Supp_Mat.pdf [file NIHMS138309-supplement-Supp_Mat.pdf]

## SUPPLEMENTAL DATA

### Supplemental Figure 1

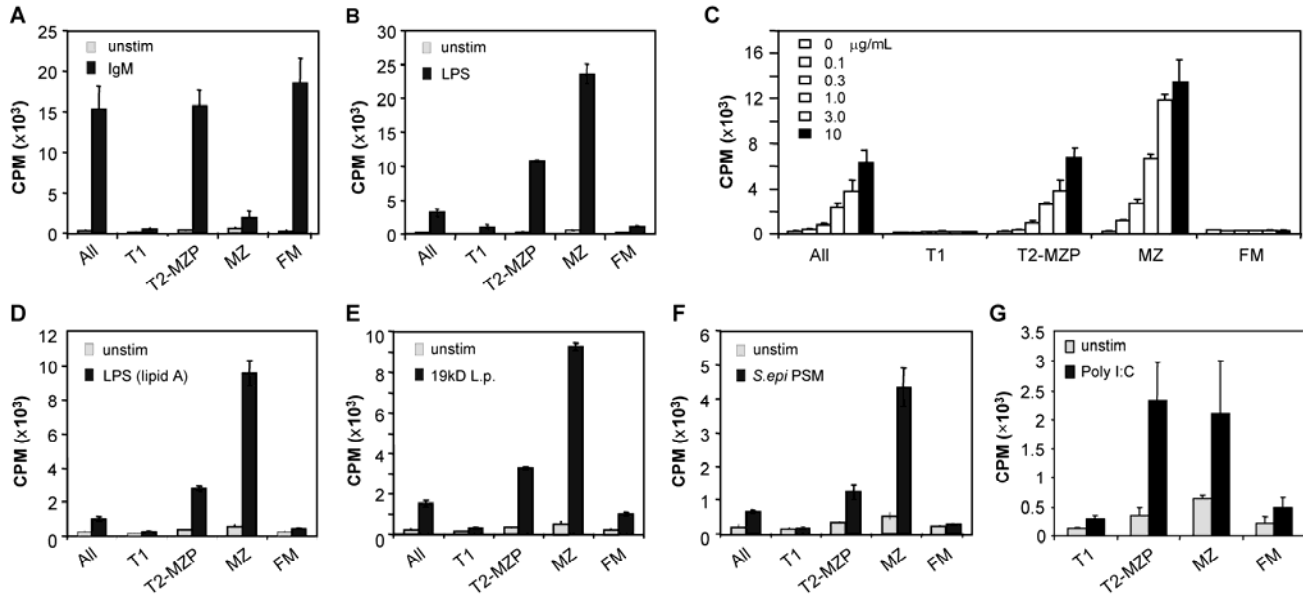

**Supplemental Figure 1.** Four splenic B cell populations exhibit distinct proliferative responses to adaptive and innate-like immune receptor engagement. Proliferative responses of FACS-sorted Balb/c splenic B cell sub-populations upon stimulation with (A) anti-IgM (10 µg/mL), (B-C) *S. minnesota* LPS, (D) phenol extracted *S. minnesota* LPS, (E) *M. tb* 19kD lipoprotein, (F) *S. epi.* PSM, all at 1 µg/mL unless otherwise indicated; and (G) 100 µg/mL poly (I:C). Essentially identical results as in (b) were obtained using *S. typhosa* LPS, and in analysis of additional wild-type murine stains including C57BL/6 and 129 mice. Representative results of one of more than 5 similar experiments are shown.

## Supplemental Figure 2

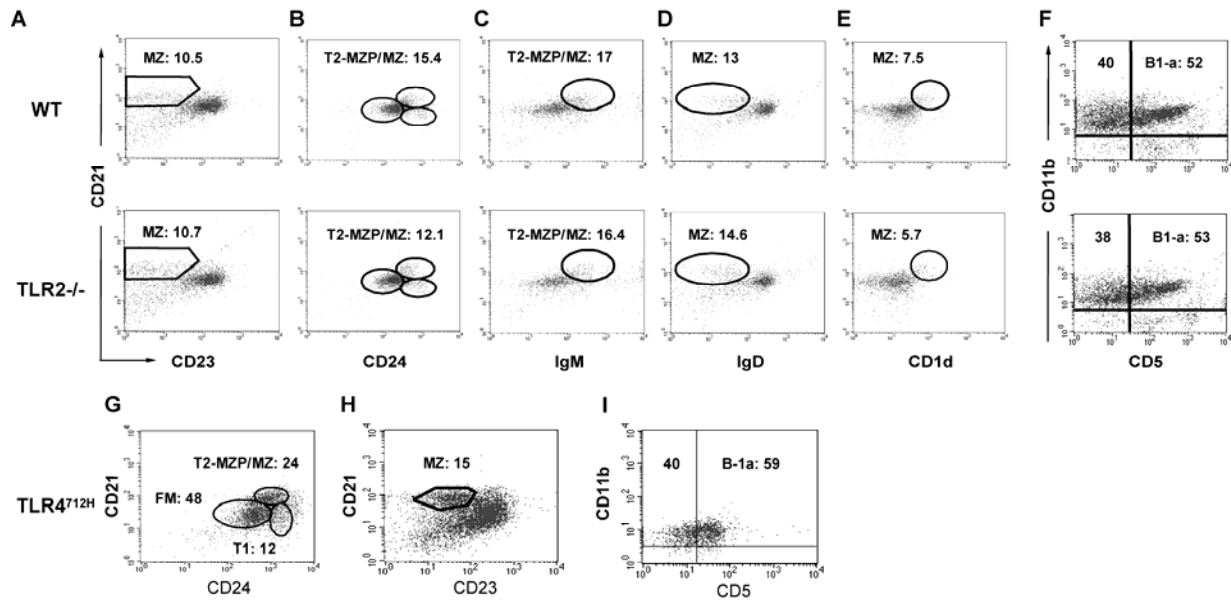

### Supplemental Figure 2. B cell subpopulations in TLR2<sup>-/-</sup> and TLR4 mutant mice.

Lymphocytes were prepared from TLR2<sup>-/-</sup> mice (TLR2<sup>-/-</sup>) and wildtype littermate controls (WT), and B220<sup>+</sup> cells analyzed for B cell subsets in the spleen for CD21 and (A) CD23, (B) CD24, (C) IgM, (D) IgD, and (E) CD1d, or peritoneum for (F) CD11b/CD5. To analyze TLR4 mutant mice, splenic and peritoneal cells were prepared from C3H/HeJ mice (TLR4<sup>712H</sup>), and B220<sup>+</sup> cells were analyzed for T1, T2-MZP/MZ, MZ, B-1a, and B-1b B cells: (G) splenic CD21/HSA(CD24), (H) splenic CD21/CD23, and (I) peritoneal CD11b/CD5. Innate-like B cells are preserved in TLR2 and TLR4 mutant mice.

### Supplemental Figure 3

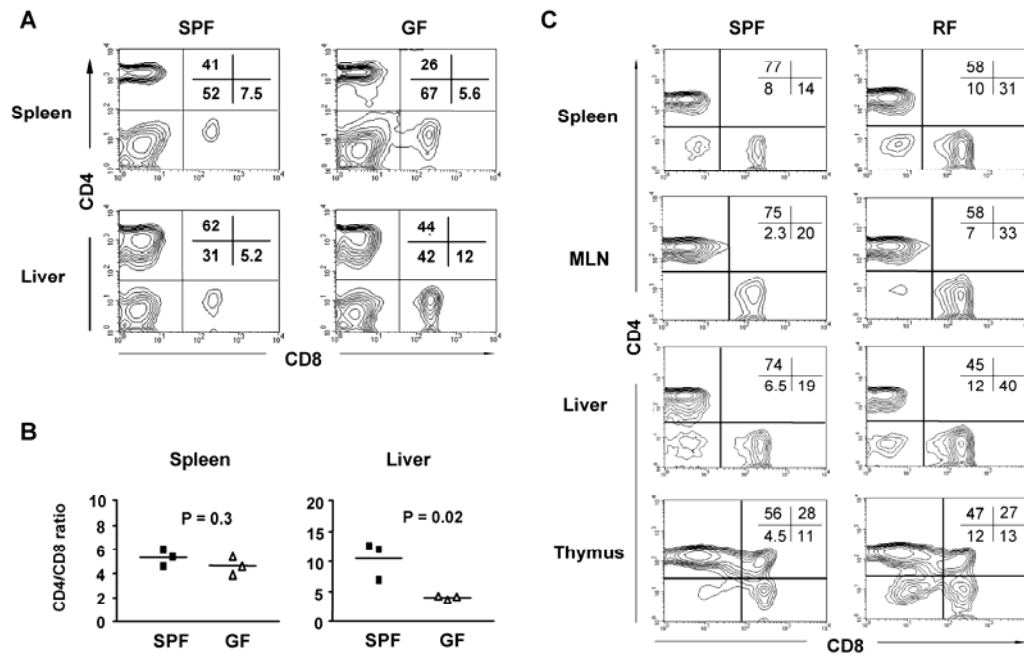

**Supplemental Figure 3.** The percentage of CD8<sup>+</sup> T cells is profoundly increased in RF mice.

Single cells were prepared from the different lymphoid compartments including spleen, liver of GF mice (A-B), and mesenteric lymph nodes (MLN) and thymus of RF and SPF control mice (C). Lymphocytes were stained for CD3, CD4, and CD8<sup>+</sup> T cells. (A) Percentages of CD4 vs. CD8 in SPF and GF mice are indicated in FACS plots. (B) Tabulated CD4/CD8 ratio in spleen and liver of SPF and GF mice showing the increase of CD8<sup>+</sup> T cells in the liver of GF mice. (C) CD4<sup>+</sup> vs. CD8<sup>+</sup> T cells in SPF and RF mice were examined in the different lymphoid compartments. The data represents the phenotypes observed in 24 GF mice and more than one hundred RF mice.

## Supplemental Figure 4

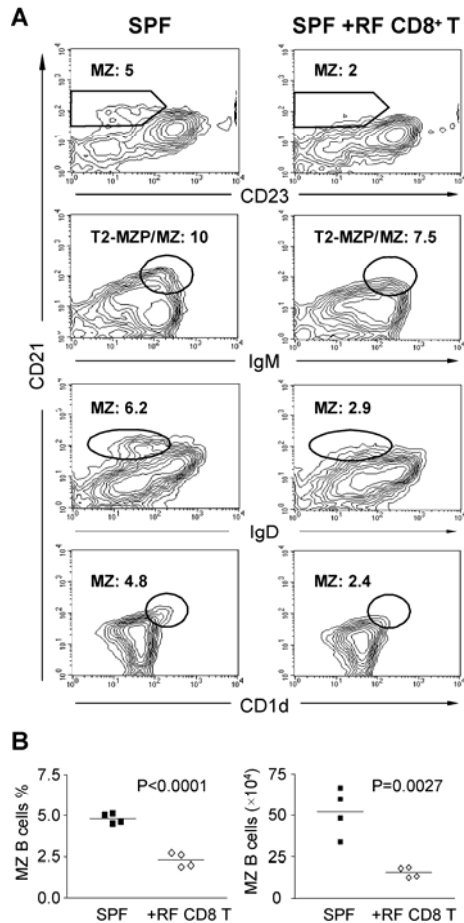

**Supplemental Figure 4.** In vivo depletion of MZ B cells by RF CD8<sup>+</sup> T cells. Four weeks old SPF mice were transferred i.v. with  $4 \times 10^7$  of splenic RF CD8<sup>+</sup> T cells and i.p. with 100  $\mu$ g of microbial antigens from RF mice. On day three after cell transfer, splenocytes were collected and stained for CD21, CD23, CD1d, IgM, and IgD in different staining combinations. The MZ B cells were analyzed in the gate of CD19<sup>+</sup> B cell population and indicated markers to determine the % MZ B cells in different staining patterns. (A) Percentage of MZ B cells from SPF mice with or without transfer of RF CD8<sup>+</sup> T cells; (B) Tabulated percentage and absolute number of MZ B cells in CD19<sup>+</sup>CD21<sup>hi</sup>CD23<sup>lo</sup> gate. The data represents at least three individual experiments.
